# Supplementary material for: Synthesis of nanosheet epitaxial growth ZSM-5 zeolite with increased diffusivity and its catalytic cracking performance
Source: Royal Society of Chemistry journal article supplement (doi:10.1039/d2cy00154c), 2022-01-01
Supplement: d2cy00154c1.pdf [file d2cy00154c1.pdf]

## Supporting information

### **Synthesis of nanosheet epitaxial growth ZSM-5 zeolite with increased diffusivity and its catalytic cracking performance**

Jing Hao<sup>a</sup>, Shuman Xu<sup>a</sup>, Dang-guo Cheng<sup>\*ab</sup>, Fengqiu Chen<sup>ab</sup>, and Xiaoli Zhan<sup>ab</sup>

<sup>a</sup>College of Chemical and Biological Engineering, Zhejiang Provincial Key Laboratory of Advanced Chemical Engineering Manufacture Technology, Zhejiang University, Hangzhou 310027, China.

<sup>b</sup>Institute of Zhejiang University-Quzhou, Quzhou 324000, China.

\* Corresponding author. Tel.: +86 571 87953382; Fax: +86 571 87951227. E-mail: dgcheng@zju.edu.cn.

**Table S1.** Textural properties of RP zeolite and N2 zeolite with different Si/Al ratio

| Sample | $S_{\text{BET}}$<br>( $\text{m}^2\text{g}^{-1}$ ) | $S_{\text{Ext}}$<br>( $\text{m}^2\text{g}^{-1}$ ) | $V_{\text{Tol}}$<br>( $\text{cm}^3\text{g}^{-1}$ ) | $V_{\text{Micro}}$<br>( $\text{cm}^3\text{g}^{-1}$ ) | $V_{\text{Meso}}/V_{\text{Micro}}$ |
|--------|---------------------------------------------------|---------------------------------------------------|----------------------------------------------------|------------------------------------------------------|------------------------------------|
| RP-120 | 387                                               | 147                                               | 0.444                                              | 0.123                                                | 2.61                               |
| S-120  | 355                                               | 106                                               | 0.439                                              | 0.129                                                | 2.40                               |
| RP-150 | 396                                               | 147                                               | 0.417                                              | 0.127                                                | 2.28                               |
| RP-200 | 400                                               | 168                                               | 0.433                                              | 0.112                                                | 2.87                               |
| RP-250 | 389                                               | 152                                               | 0.332                                              | 0.122                                                | 1.72                               |
| RP-300 | 349                                               | 128                                               | 0.362                                              | 0.112                                                | 2.23                               |
| N2-50  | 506                                               | 313                                               | 0.758                                              | 0.100                                                | 6.58                               |
| S-50   | 465                                               | 281                                               | 0.716                                              | 0.095                                                | 6.54                               |
| N2-120 | 319                                               | 119                                               | 0.462                                              | 0.103                                                | 3.48                               |

**Table S2.** Acidity properties of RP and N2 zeolites with different Si/Al ratio

| Sample | Si/Al <sup>a</sup> | Acidity by<br>NH <sub>3</sub> -TPD<br>(mmol·g <sup>-1</sup> ) |        | Total acid<br>Amount<br>(mmol·g <sup>-1</sup> ) | Total acid Density <sup>b</sup><br>(mmol·m <sup>-2</sup> ) | Acidity by<br>Py-IR<br>(μmol·g <sup>-1</sup> ) |      |            |            | B acid Density <sup>c</sup><br>(μmol·m <sup>-2</sup> ) |
|--------|--------------------|---------------------------------------------------------------|--------|-------------------------------------------------|------------------------------------------------------------|------------------------------------------------|------|------------|------------|--------------------------------------------------------|
|        |                    | Weak                                                          | Strong |                                                 |                                                            | B                                              | L    | 150 °C-B/L | 250 °C-B/L |                                                        |
|        |                    | RP-120                                                        | 129    | 0.080                                           | 0.111                                                      | 0.19                                           | 0.49 | 63.4       | 40.3       | 1.6                                                    |
| RP-150 | 160                | 0.064                                                         | 0.066  | 0.13                                            | 0.33                                                       | 49.9                                           | 30.1 | 1.7        | 5.5        | 0.13                                                   |
| RP-200 | 204                | 0.056                                                         | 0.069  | 0.13                                            | 0.31                                                       | 32.9                                           | 67.2 | 0.5        | na*        | 0.08                                                   |
| RP-250 | 225                | 0.048                                                         | 0.051  | 0.10                                            | 0.25                                                       | 23.4                                           | 56.8 | 0.4        | na         | 0.06                                                   |
| RP-300 | 252                | 0.034                                                         | 0.044  | 0.08                                            | 0.22                                                       | 24.3                                           | 46.3 | 0.5        | na         | 0.07                                                   |
| N2-50  | 50                 | 0.177                                                         | 0.263  | 0.44                                            | 0.87                                                       | 69.9                                           | 24.2 | 2.9        | 2.9        | 0.14                                                   |
| N2-120 | 125                | 0.060                                                         | 0.089  | 0.15                                            | 0.47                                                       | 49.9                                           | 22.0 | 2.3        | 3.2        | 0.16                                                   |

<sup>a</sup> Actual Si/Al ratio determined by inductively coupled plasma (ICP).

<sup>b</sup> The ratio of the total amount of acid to the specific surface area.

<sup>c</sup> The ratio of B acid amount to the specific surface area. The test temperature of Py-IR at 150 °C is used to calculate the B acid density.

\*not available.

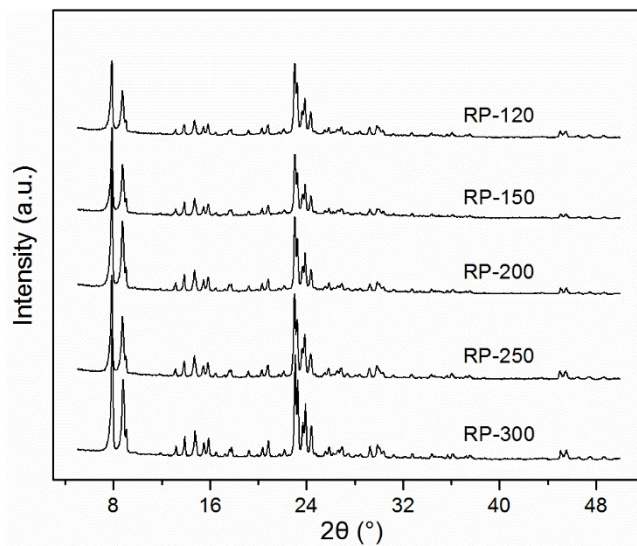

**Fig. S1** XRD patterns of calcinated RP zeolite with different Si/Al ratio.

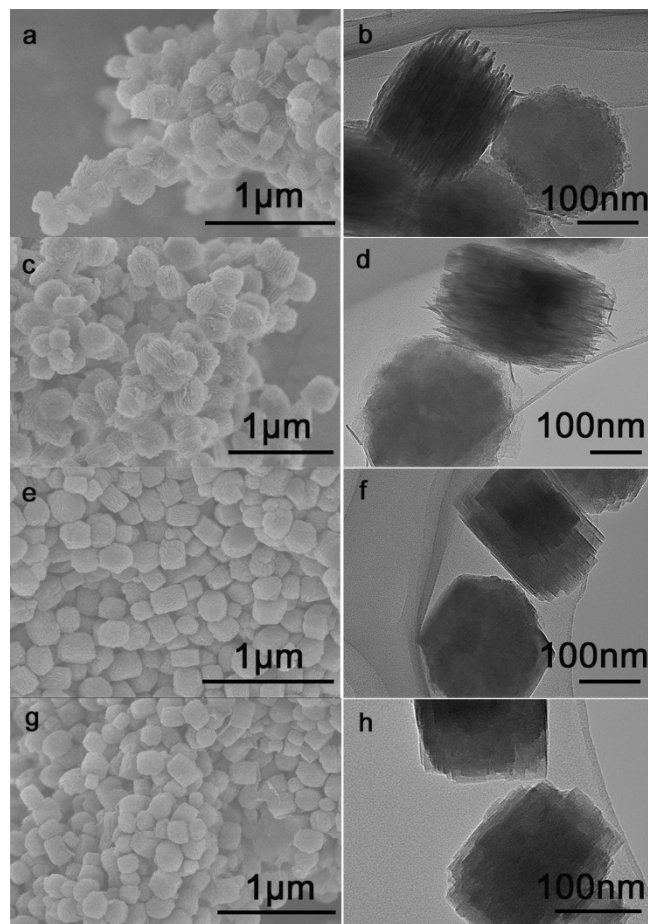

**Fig. S2** SEM and TEM images of RP-150 (a, b), RP-200 (c, d), RP-250 (e, f), RP-300 (g, h).

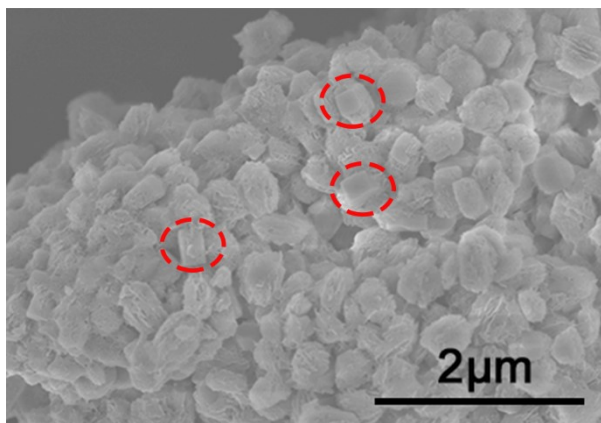

**Fig. S3** RP zeolite synthesized with Si/Al ratio of 120 and water content of 4000. The synthesized material shows some bulk-shaped zeolite and phase separation.

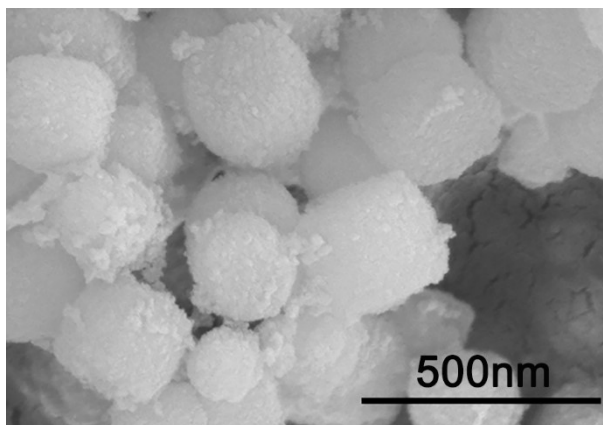

**Fig. S4** RP zeolite synthesized with Si/Al ratio of 50 and water molar ratio of 800. The appearance of layered epitaxial growth is not shown when Si/Al=50.

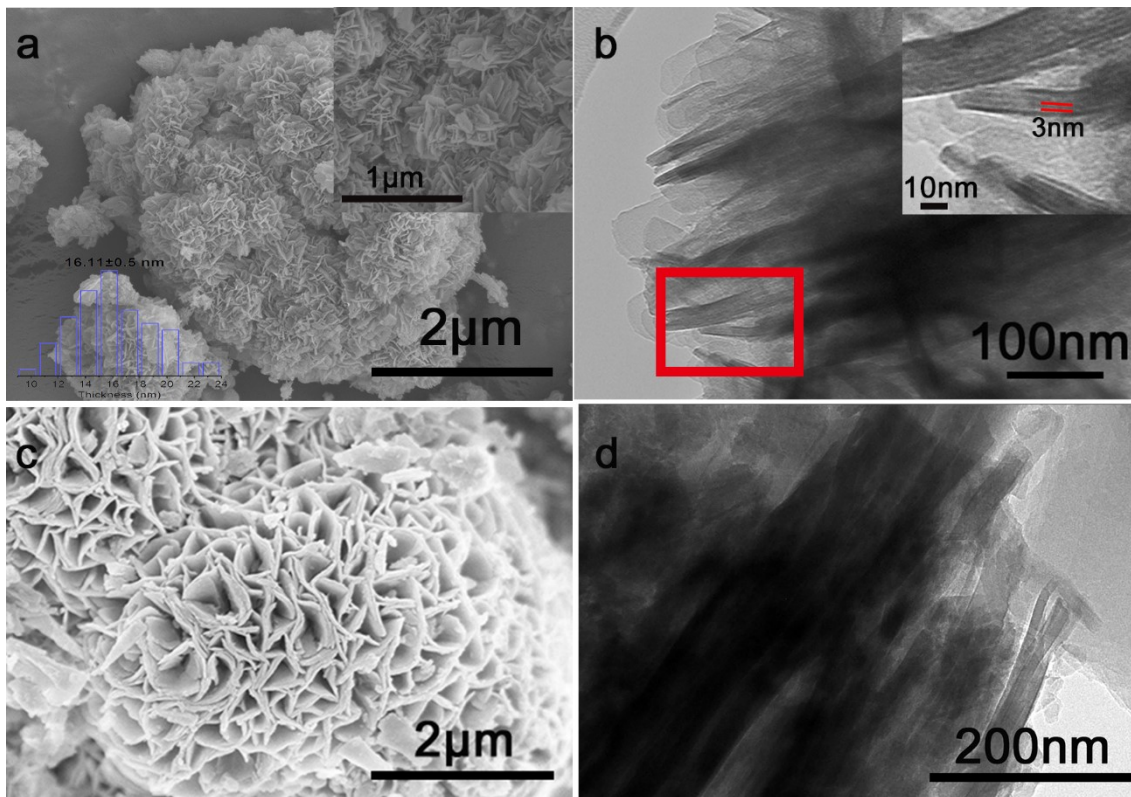

Fig. S5 SEM and TEM images of N2-50 (a, b) and N2-120 (c, d).



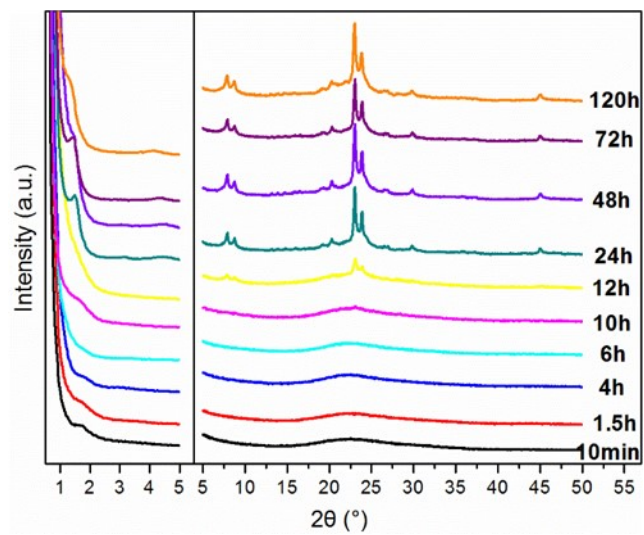

**Fig. S6** The low-angle and high-angle XRD patterns of N2-50 with different synthesis time.

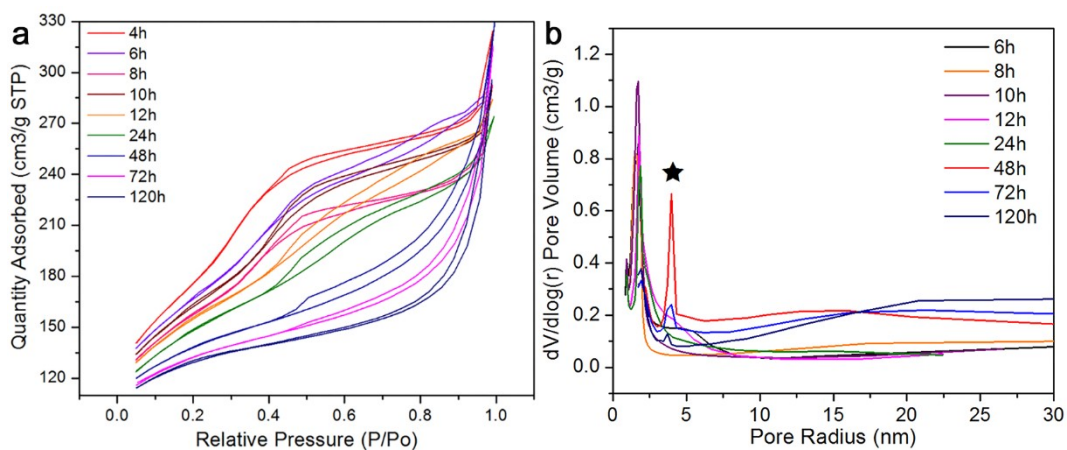

**Fig. S7** (a)  $N_2$  physisorption isotherms of RP-120 with different hydrothermal time. The curves have appropriate offsets for intuitiveness. After 24 h of hydrothermal treatment, the high-pressure hysteresis loop has changed from H4 to H3 type, indicating the formation of slit-shaped mesopores. (b) BJH pore size distribution of RP-120 with different hydrothermal treatment time.

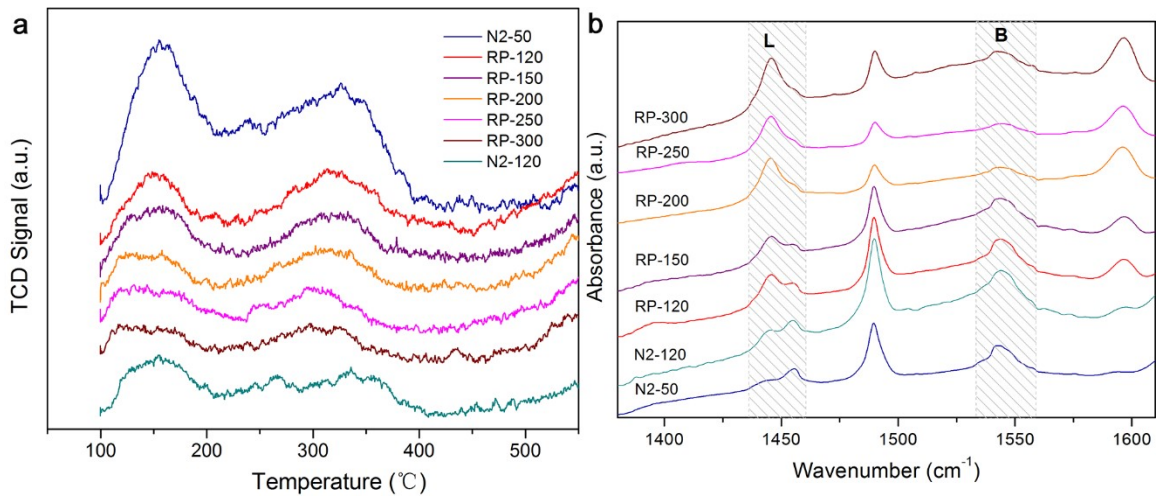

**Fig. S8** (a) NH<sub>3</sub>-TPD curves of RP and N2 zeolites, confirming the presence of weak and strong acids; (b) FTIR spectra of adsorbed pyridine.

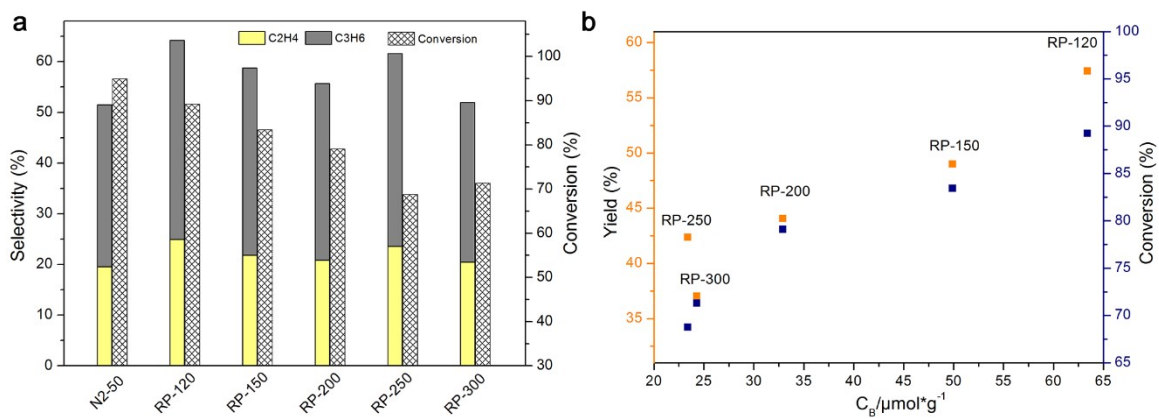

**Fig. S9** (a) The conversion of n-heptane and the selectivity of ethylene and propylene of RP zeolite; (b) The conversion and total yield of ethylene and propylene as a function of B acid amount.

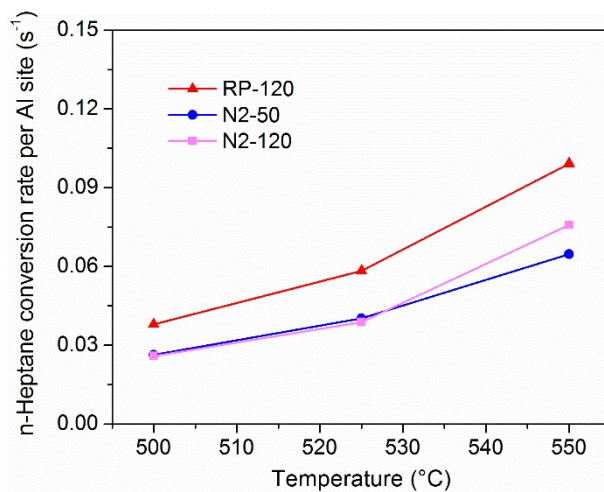

**Fig. S10** n-Heptane conversion rate per Al site of the three zeolites. The reaction is measured at 100 h<sup>-1</sup> WHSV, and the conversion rate of n-heptane is within 10%.

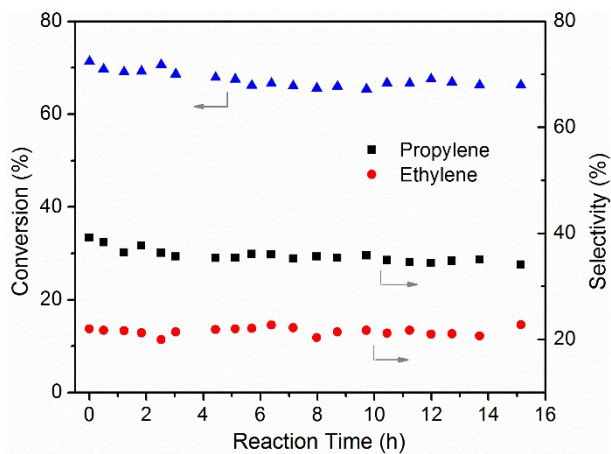

Fig. S11 The stability evaluation of N2-120 zeolite.

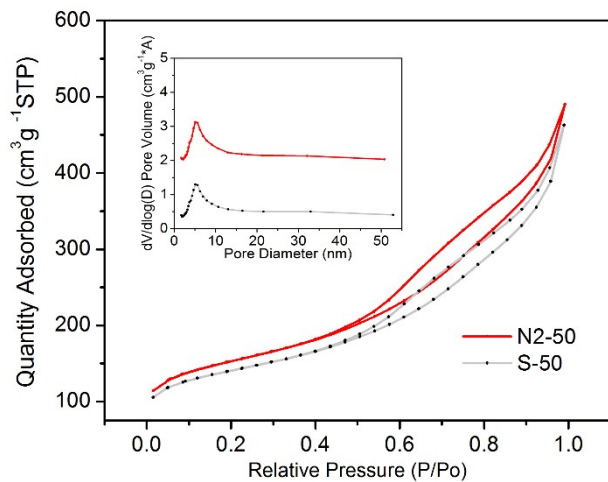

**Fig. S12** N<sub>2</sub> physisorption isotherms and pore size distributions for N2-50 and S-50 zeolites.
